# Supplementary material
Source: MDPI journal article supplement (https://www.mdpi.com/1424-2818/11/9/152)
Supplement: s1 [file s1]

**Table S1**
**Reagents used for molecular procedures**

Reagents and buffer ingredients used for molecular protocols. In parentheses volumes of reagents needed to reach the specified volume of buffer.

| <b>Reagents</b>                                                                                                                                   | <b>Concentration</b> | <b>Supplier</b> |
|---------------------------------------------------------------------------------------------------------------------------------------------------|----------------------|-----------------|
| TE Buffer (100 ml)                                                                                                                                |                      |                 |
| Tris-HCl (90 ml)                                                                                                                                  | 10 mM                | Carl Roth       |
| EDTA (10 ml)                                                                                                                                      | 1 mM                 | Carl Roth       |
| Vertebrate Lysis Buffer (100 ml)                                                                                                                  |                      |                 |
| NaCl (4 ml)                                                                                                                                       | 100 M                | Carl Roth       |
| Tris-HCl (10 ml)                                                                                                                                  | 1 M                  | Carl Roth       |
| EDTA (4 ml)                                                                                                                                       | 0.5 M                | Carl Roth       |
| SDS (5 ml)                                                                                                                                        | 20 %                 | Carl Roth       |
| Water (77 ml)                                                                                                                                     |                      |                 |
| Proteinase K solution                                                                                                                             | 20 mg/ml             | Bioline         |
| Binding Buffer (14 ml)                                                                                                                            |                      |                 |
| GuSCN (7 ml)                                                                                                                                      | 4 M                  | Carl Roth       |
| Ethanol (7 ml)                                                                                                                                    | 96 %                 | Carl Roth       |
| Washing Buffer 1 (20 ml)                                                                                                                          |                      |                 |
| GuSCN (5.2 ml)                                                                                                                                    | 4 M                  | Carl Roth       |
| Ethanol (14.8 ml)                                                                                                                                 | 96 %                 | Carl Roth       |
| Washing Buffer 2 (475 ml)                                                                                                                         |                      |                 |
| Ethanol (300 ml)                                                                                                                                  | 60 %                 | Carl Roth       |
| NaCl (4.75 ml)                                                                                                                                    | 50 mM                | Carl Roth       |
| Tris-HCl (4.75 ml)                                                                                                                                | 10 mM                | Carl Roth       |
| EDTA (0.475 ml)                                                                                                                                   | 0.5 mM               | Carl Roth       |
| Taq-DNA Polymerase                                                                                                                                | 5 U/μl               | Peqlab          |
| Reactionbuffer Y                                                                                                                                  | 2.5 mM               | Peqlab          |
| MgCl <sub>2</sub>                                                                                                                                 | 25 mM                | Peqlab          |
| dNTPs                                                                                                                                             | 2.5 mM               | Carl Roth       |
| EasyLadder I                                                                                                                                      | 100 lanes            | Bioline         |
| peqGOLD Universal Agarose                                                                                                                         |                      | Peqlab          |
| Loading Buffer (10 ml)                                                                                                                            |                      |                 |
| Bromophenol blue (0.25 g)                                                                                                                         |                      | Carl Roth       |
| Sucrose (4 g)                                                                                                                                     |                      | Carl Roth       |
| Water (5 ml)                                                                                                                                      |                      |                 |
| TE Buffer (5 ml)                                                                                                                                  | 1×                   |                 |
| SYBR™ Green                                                                                                                                       | 10.000×              | ThermoFisher    |
| TAE Buffer (stock): dilution of 242.3 g Tris and 37.2 g EDTA, in 58 ml Glacial acetic acid. Concentration for 1x TAE is 40 mM Tris and 2 mM EDTA. |                      |                 |
