# Supplementary material
Source: MDPI journal article supplement (https://www.mdpi.com/1424-2818/11/9/152)
Supplement: s1 [file s1]

Table S1

Specimens used in the Barcoding analysis.

Vouchers (when geographic information whenever possible) and GenBank accession numbers for DNA sequences of 16S used in our analyses. In bold, sequences generated in the framework of the project of Barcoding of the Squamata of Paraguay. In the column “Origin” we provide the first publication of the sequence. At the bottom of the table, the references are provided.

| Species                             | Voucher     | Origin                 | GenBank         | Locality                                                         | Lat/Long            |
|-------------------------------------|-------------|------------------------|-----------------|------------------------------------------------------------------|---------------------|
| <i>Ameiva ameiva</i>                | ALA 3502    | This study             | <b>MN276193</b> | Parque Nacional Cerro Cora, Amambay Department (P)               | -22.6502 / -56.0141 |
| <i>Ameiva ameiva</i>                | ALA 3518    | This study             | <b>MN276194</b> | Parque Nacional Cerro Cora, Amambay Department (P)               | -22.6502 / -56.0141 |
| <i>Ameiva ameiva</i>                | GK 3611     | This study             | <b>MN276195</b> | Granja El Roble, Concepción Department (P)                       | -23.4560 / -57.2803 |
| <i>Ameiva ameiva</i>                | 053         | Rodriguez 2012         | JQ627268        | São Carlos, São Paulo, Brazil                                    |                     |
| <i>Ameiva ameiva</i>                | 064         | Rodriguez 2012         | JQ627269        | São Carlos, São Paulo, Brazil                                    |                     |
| <i>Ameiva ameiva</i>                | 071         | Rodriguez 2012         | JQ627270        | São Carlos, São Paulo, Brazil                                    |                     |
| <i>Ameiva ameiva</i>                | 108         | Rodriguez 2012         | JQ627271        | São Carlos, São Paulo, Brazil                                    |                     |
| <i>Ameiva ameiva</i>                | 116         | Rodriguez 2012         | JQ627272        | São Carlos, São Paulo, Brazil                                    |                     |
| <i>Ameiva ameiva</i>                | MTD 41641   | Koch et al. 2013       | KF742714        | Bolognesi, Region Ucayali, Peru                                  | -9.8974 / -76.9416  |
| <i>Ameiva ameiva</i>                | MTD 41643   | Koch et al. 2013       | KF742715        | Izcozacín, Region Pinasco, Peru                                  |                     |
| <i>Ameiva ameiva</i>                | MTD 46527   | Koch et al. 2013       | KF742716        | Oxapampa, Region Pinasco, Peru                                   | -10.5750 / -75.4001 |
| <i>Ameiva ameiva</i>                | MNHNP 11823 | This study             | <b>MN276196</b> | Cabaña Pindú, San Pedro Department (P)                           | -24.2036 / -56.4249 |
| <i>Ameiva ameiva</i>                | MNHNP 11825 | This study             | <b>MN276197</b> | Asentamiento San Ramón, Concepción Department (P)                | -22.8828 / -57.4041 |
| <i>Ameiva ameiva</i>                | MNHNP 11828 | This study             | <b>MN276198</b> | Estancia Kumaré, Concepción Department (P)                       | -22.8975 / -57.4013 |
| <i>Ameiva ameiva</i>                | MNHNP 11829 | This study             | <b>MN276199</b> | Estancia Kumaré, Concepción Department (P)                       | -22.8975 / -57.4013 |
| <i>Ameiva ameiva</i>                | MNHNP 11834 | This study             | <b>MN276200</b> | Retiro de Estancia Kumaré, Concepción Department (P)             | -22.9377 / -57.3954 |
| <i>Ameiva ameiva</i>                | PCS 300     | This study             | <b>MN276201</b> | Estancia Achira, Cordillera Department (P)                       | -25.1270 / -57.2263 |
| <i>Ameiva ameiva</i>                | PCS 306     | This study             | <b>MN276202</b> | Estancia La Susanita, Ñeembucú Department (P)                    | -26.1545 / -58.0653 |
| <i>Ameiva ameiva</i>                | PCS 407     | This study             | <b>MN276203</b> | Retiro 7 de Junio, Estancia Garay Cue, Concepción Department (P) | -22.5830 / -57.3278 |
| <i>Ameiva ameiva</i>                | PCS 572     | This study             | <b>MN276204</b> | Ocampo Cué, San Pedro Department (P)                             | -23.8802 / -57.1050 |
| <i>Ameiva ameiva</i>                | PCS 595     | This study             | <b>MN276205</b> | Estancia La Rural, Presidente Hayes Department (P)               | -24.8290 / -57.7670 |
| <i>Ameivula</i> sp.                 | MZ 78779    | Whiting et al. 2003    | AY217992        | Barra do Garças, Mato Grosso, Brazil                             | -15.8909 / -52.2506 |
| <i>Ameivula</i> sp.                 | MRT946089   | Pellegrino et al. 2001 | AF420759        | Barra do Garças, Mato Grosso, Brazil                             | -15.8909 / -52.2506 |
| <i>Ameivula apipensis</i>           | MNHNP 11826 | This study             | <b>MN276206</b> | Asentamiento San Ramón, Concepción Department (P)                | -22.8828 / -57.4041 |
| <i>Ameivula apipensis</i>           | MNHNP 11830 | This study             | <b>MN276207</b> | Estancia Kumaré, Concepción Department (P)                       | -22.8975 / -57.4013 |
| <i>Ameivula apipensis</i>           | PC 17       | This study             | <b>MN276208</b> | Quinta Las Andreas, Cordillera Department (P)                    | -25.2250 / -57.2410 |
| <i>Ameivula apipensis</i>           | PCS 403     | This study             | <b>MN276209</b> | Retiro 7 de Junio, Estancia Garay Cue, Concepción Department (P) | -22.5830 / -57.3278 |
| <i>Amerotyphlops brongersmianus</i> | GK 3675     | This study             | <b>MN276210</b> | Estancia Schoder, Concepción Department (P)                      | -23.4724 / -57.2363 |
| <i>Amerotyphlops brongersmianus</i> | GK 3813     | This study             | <b>MN276211</b> | Granja El Roble, Concepción Department (P)                       | -23.4560 / -57.2803 |
| <i>Amerotyphlops brongersmianus</i> | GK 3908     | This study             | <b>MN276212</b> | Areguá, Central Department (P)                                   | -25.3156 / -57.3771 |
| <i>Amerotyphlops brongersmianus</i> |             | Simões et al. 2015     | KR815889        | No data.                                                         |                     |
| <i>Amphisbaena alba</i>             | CHUNB 30678 | Mott & Vieites 2009    | FJ441705        | Jalapão, Tocantins, Brazil                                       | -10.2855 / -46.7647 |
| <i>Amphisbaena alba</i>             | UFMT 3468   | Mott & Vieites 2009    | FJ441706        | Guarantã do Norte, Mato Grosso, Brazil                           | -9.9501 / -54.9147  |
| <i>Amphisbaena alba</i>             |             | Simões et al. 2015     | KR815887        | No data.                                                         |                     |
| <i>Amphisbaena angustifrons</i>     | Montero 3   | Mott & Vieites 2009    | FJ441707        | Tucumán, Argentina                                               |                     |

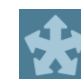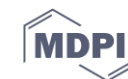

| Species                            | Voucher        | Origin                  | GenBank         | Locality                                           | Lat/Long            |
|------------------------------------|----------------|-------------------------|-----------------|----------------------------------------------------|---------------------|
| <i>Amphisbaena bolivica</i>        | GK 3687        | This study              | <b>MN276213</b> | Estancia Amistad, Boquerón Department (P)          | -22.4077 / -60.7259 |
| <i>Amphisbaena bolivica</i>        | PCS 542        | This study              | <b>MN276214</b> | Laguna Blanca, San Pedro Department (P)            | -23.8174 / -56.2910 |
| <i>Amphisbaena bolivica</i>        | Montero 8      | Mott & Vieites 2009     | FJ441669        | Tucumán, Argentina                                 |                     |
| <i>Amphisbaena bolivica</i>        | Montero 11     | Mott & Vieites 2009     | FJ441670        | Tucumán, Argentina                                 |                     |
| <i>Amphisbaena mertensi</i>        | KU 290721      | Mott & Vieites 2009     | FJ441674        | Alto Verá, Itapúa Department (P)                   | -26.7507 / -55.7717 |
| <i>Amphisbaena mertensi</i>        | MPEG 21462     | Mott & Vieites 2009     | FJ441676        | Marília, São Paulo, Brazil                         | -22.2175 / -49.9505 |
| <i>Amphisbaena prunicolor</i>      | PCS 521        | This study              | <b>MN276215</b> | Laguna Blanca, San Pedro Department (P)            | -23.8174 / -56.2910 |
| <i>Amphisbaena sp.</i>             | PCS 314        | This study              | <b>MN276216</b> | Tobich, Alto Paraguay Department (P)               | -20.2913 / -58.5636 |
| <i>Boiruna maculata</i>            | GK 3722        | This study              | <b>MN276217</b> | Filadelfia, Boquerón Department (P)                | -22.3512 / -60.0544 |
| <i>Boiruna maculata</i>            | Rel 11 2 12    | This study              | <b>MN276218</b> | Paraguay                                           |                     |
| <i>Bothrops alternatus</i>         | MM FE2         | Fenwick et al. 2009     | EU867262        | Itarapina Ecological Station, São Paulo, Brazil    | -22.2496 / -47.8259 |
| <i>Bothrops alternatus</i>         | ITS 358        | Fenwick et al. 2009     | EU867263        | Itarapina Ecological Station, São Paulo, Brazil    | -22.2496 / -47.8259 |
| <i>Bothrops alternatus</i>         | PCS 333        | This study              | <b>MN276219</b> | Belén, Concepción Department (P)                   | -23.4445 / -57.3544 |
| <i>Bothrops diporus</i>            | PT 3404        | Castoe & Parkinson 2006 | DQ305454        | Castro Barros, La Rioja, Argentina                 |                     |
| <i>Bothrops jararaca</i>           | MM (19)6       | Fenwick et al. 2009     | EU867266        | Itarapina Ecological Station, São Paulo, Brazil    | -22.2496 / -47.8259 |
| <i>Bothrops jararacussu</i>        | MZUSP 15220    | Alencar et al. 2016     | KX694622        | No data.                                           |                     |
| <i>Bothrops moojeni</i>            | MM-OBA         | Fenwick et al. 2009     | EU867271        | Itarapina Ecological Station, São Paulo, Brazil    | -22.2496 / -47.8259 |
| <i>Bothrops neuwiedii</i>          | PCS 302        | This study              | <b>MN276220</b> | Estancia Achira, Cordillera Department (P)         | -25.1277 / -57.2263 |
| <i>Bothrops neuwiedii</i>          | PCS 318        | This study              | <b>MN276221</b> | Tobich, Alto Paraguay Department (P)               | -20.2913 / -58.5636 |
| <i>Bothrops neuwiedii</i>          | PCS 331        | This study              | <b>MN276222</b> | Granja El Roble, Concepción Department (P)         | -23.4560 / -57.2803 |
| <i>Bothrops neuwiedii</i>          | PCS 504        | This study              | <b>MN276223</b> | Laguna Blanca, San Pedro Department (P)            | -23.7572 / -56.3226 |
| <i>Bothrops neuwiedii</i>          | PCS 530        | This study              | <b>MN276224</b> | Guairá Department (P)                              | -25.2250 / -57.2410 |
| <i>Bothrops neuwiedii</i>          | R 14           | This study              | <b>MN276225</b> | Quinta Las Andreas, Cordillera Department (P)      | -22.7096 / -57.3778 |
| <i>Bothrops neuwiedii</i>          | 005            | GenBank only            | JQ627282        | "Brazil". Coordinates provided.                    | -21.98 / -47.87     |
| <i>Bothrops neuwiedii</i>          | CLP 3          | Fenwick et al. 2009     | EU867272        | No data.                                           |                     |
| <i>Cercosaura schreibersii</i>     | LG 1168        | Pellegrino et al. 2001  | AF420729        | São Paulo, São Paulo, Brazil                       | -23.55 / -46.63     |
| <i>Cercosaura schreibersii</i>     | LG 927         | Pellegrino et al. 2001  | AF420749        | São Paulo, São Paulo, Brazil                       | -23.55 / -46.63     |
| <i>Cercosaura schreibersii</i>     | PCS 410        | This study              | <b>MN276226</b> | Estancia Garay Cué, Concepción Department (P)      | -22.6502 / -56.0141 |
| <i>Cercosaura sp.</i>              | ALA 3498       | This study              | <b>MN276227</b> | Parque Nacional Cerro Cora, Amambay Department (P) | -22.3512 / -60.0544 |
| <i>Chironius maculiventris</i>     | GK 3720        | This study              | <b>MN276228</b> | Filadelfia, Boquerón Department (P)                | -22.8645 / -59.5876 |
| <i>Chironius maculiventris</i>     | PCS 319        | This study              | <b>MN276229</b> | Ruta 9, Km 398, Boquerón Department (P)            | -23.2643 / -56.2038 |
| <i>Chironius maculiventris</i>     | LCBB 23        | Hamdan et al. 2017      | MF673221        | Rio Grande do Sul, Brazil                          |                     |
| <i>Clelia clelia</i>               | PCS 468        | This study              | <b>MN276230</b> | Estancia Ka'i Rague, Amambay Department (P)        | -25.2588 / -57.2850 |
| <i>Clelia clelia</i>               | MNHN 1997.2094 | Vidal et al. 2000       | AF158472        | Petit Saut, French Guiana                          | -5.07 / -53.06      |
| <i>Colobosaura kraepelini</i>      | GK 3852        | This study              | <b>MN276231</b> | San Bernardino, Cordillera Department (P)          | -22.3389 / -60.0349 |
| <i>Colobosaura modesta</i>         | LG 1145        | Whiting et al. 2003     | AY217953        | Niquelândia, Goiás, Brazil                         | -14.467 / -48.454   |
| <i>Epicrates alvarezii</i>         | GK 3678        | This study              | <b>MN276232</b> | Filadelfia, Boquerón Department (P)                | -23.8174 / -56.2910 |
| <i>Epicrates crassus</i>           |                | Vences et al. 2001      | AF215273        | No data.                                           |                     |
| <i>Epicrates crassus</i>           | PCS 517        | This study              | <b>MN276233</b> | Laguna Blanca, San Pedro Department (P)            | -23.4445 / -57.3544 |
| <i>Erythrolamprus aesculapii</i>   | MNHN 1996.7896 | Vidal et al. 2000       | AF158531        | BPS road, Petit Saut, French Guiana                | -5.116 / -52.962    |
| <i>Erythrolamprus aesculapii</i>   | IBSP 74046     | Zaher et al. 2009       | GQ457736        | Brazil                                             |                     |
| <i>Erythrolamprus aesculapii</i>   | ROM 47474      | Hodson & Lehtinen 2017  | KY986512        | Guyana                                             |                     |
| <i>Erythrolamprus aesculapii</i>   | PCS 327        | This study              | <b>MN276234</b> | Belén, Concepción Department (P)                   | -22.4077 / -60.7259 |
| <i>Erythrolamprus poecilogyrus</i> | GK 3734        | This study              | <b>MN276235</b> | Estancia Amistad, Boquerón Department (P)          | -26.1102 / -58.0180 |
| <i>Erythrolamprus poecilogyrus</i> | LSUMZ H-6972   | Hodson & Lehtinen 2017  | KY986516        | Argentina                                          |                     |



| Species                            | Voucher         | Origin                | GenBank         | Locality                                                       | Lat/Long            |
|------------------------------------|-----------------|-----------------------|-----------------|----------------------------------------------------------------|---------------------|
| <i>Erythrolamprus poecilogyrus</i> | PCS 309         | This study            | <b>MN276236</b> | Estancia Agatapé, Ñeembucú Department (P)                      | -20.2913 / -58.5636 |
| <i>Erythrolamprus poecilogyrus</i> | PCS 315         | This study            | <b>MN276237</b> | Tobich, Alto Paraguay Department (P)                           | -24.8290 / -57.7670 |
| <i>Erythrolamprus poecilogyrus</i> | PCS 599         | This study            | <b>MN276238</b> | Estancia La Rural, Presidente Hayes Department (P)             | -25.7209 / -56.2512 |
| <i>Erythrolamprus reginae</i>      |                 | Simões et al. 2016    | KX277247        | No data.                                                       |                     |
| <i>Erythrolamprus reginae</i>      | PCS 529         | This study            | <b>MN276239</b> | Granja SHS, Guairá Department (P)                              | -22.3470 / -60.0489 |
| <i>Erythrolamprus sagittifer</i>   | GK 3747         | This study            | <b>MN276240</b> | Filadelfia, Boquerón Department (P)                            | -25.2250 / -57.2410 |
| <i>Helicops leopardinus</i>        | GK 3612         | This study            | <b>MN276241</b> | Río Paraguay, Concepción Department (P)                        | -23.4174 / -57.4526 |
| <i>Helicops leopardinus</i>        | PCS 600         | This study            | <b>MN276242</b> | Ruta 9, Km 68,5, Presidente Hayes Department (P)               | -24.8460 / -57.7440 |
| <i>Hemidactylus mabouia</i>        | TZ 12           | Rocha et al. 2010     | HM192543        | Supplementary Information not available.                       |                     |
| <i>Hemidactylus mabouia</i>        | TZ 23           | Rocha et al. 2010     | HM192545        | Supplementary Information not available.                       |                     |
| <i>Hemidactylus mabouia</i>        | BP 6            | Rocha et al. 2010     | HM192547        | Supplementary Information not available.                       |                     |
| <i>Hemidactylus mabouia</i>        | Z 47            | Rocha et al. 2010     | HM192550        | Supplementary Information not available.                       |                     |
| <i>Hemidactylus mabouia</i>        | SA 29           | Rocha et al. 2010     | HM192609        | Supplementary Information not available.                       |                     |
| <i>Hemidactylus mabouia</i>        | 3MA 41          | Rocha et al. 2010     | JF329706        | Supplementary Information not available.                       |                     |
| <i>Hemidactylus mabouia</i>        | PCS 597         | This study            | <b>MN276243</b> | Estancia La Rural, Presidente Hayes Department (P)             | -24.8290 / -57.7670 |
| <i>Homonota horrida</i>            | BYU 47491       | Cacciali et al. 2017  | <b>MF278828</b> | RP 190, Mendoza, Argentina                                     | -35.538 / -68.080   |
| <i>Homonota horrida</i>            | LJAMM-CNP 10495 | Cacciali et al. 2017  | <b>MF278829</b> | RP 190, Mendoza, Argentina                                     | -35.538 / -68.080   |
| <i>Homonota horrida</i>            | LJAMM-CNP 10576 | Cacciali et al. 2017  | <b>MF278830</b> | 2.3 km S from Punta del Agua, Mendoza, Argentina               | -35.541 / -68.079   |
| <i>Homonota septentrionalis</i>    | MNHNP 11873     | Cacciali et al. 2017  | <b>MF278831</b> | Mariscal Estigarribia, Boquerón Department (P)                 | -22.0365 / -60.6168 |
| <i>Homonota septentrionalis</i>    | MNHNP 12238     | Cacciali et al. 2017  | <b>MF278832</b> | Fortín Mayor Infante Rivarola, Boquerón Department (P)         | -21.6790 / -62.4010 |
| <i>Homonota septentrionalis</i>    | SMF 101984      | Cacciali et al. 2017  | <b>MF278833</b> | Fortín Mayor Infante Rivarola, Boquerón Department (P)         | -21.6790 / -62.4010 |
| <i>Homonota marthae</i>            | GK 3731         | Cacciali et al. 2018a | <b>MG947388</b> | Filadelfia, Boquerón Department (P)                            | -22.3470 / -60.0489 |
| <i>Hydrodynastes gigas</i>         | MRT 969         | Zaher et al. 2009     | GQ457743        | Brazil                                                         |                     |
| <i>Hydrodynastes gigas</i>         | PC 29           | This study            | <b>MN276244</b> | Ruta 3, km 121, San Pedro Department (P)                       | -24.7432 / -56.6285 |
| <i>Kentropyx viridistriga</i>      | UFMT 1270       | Werneck et al. 2009   | EU345182        | Mato Grosso, Brazil                                            |                     |
| <i>Kentropyx viridistriga</i>      | UFMT 2375       | Werneck et al. 2009   | EU345183        | Mato Grossi, Brazil                                            |                     |
| <i>Kentropyx viridistriga</i>      | PCS 495         | This study            | <b>MN276245</b> | Laguna Blanca, San Pedro Department (P)                        | -23.8174 / -56.2910 |
| <i>Leptophis ahaetulla</i>         | GK 3594         | This study            | <b>MN276246</b> | Granja El Roble, Concepción Department (P)                     | -23.4560 / -57.2803 |
| <i>Leptophis ahaetulla</i>         | GK 3809         | This study            | <b>MN276247</b> | Granja El Roble, Concepción Department (P)                     | -23.4560 / -57.2803 |
| <i>Leptophis ahaetulla</i>         | PCS 532         | This study            | <b>MN276248</b> | Granja SHS, Guairá Department (P)                              | -25.7209 / -56.2512 |
| <i>Leptophis ahaetulla</i>         | LSUMZ 13874     | Murphy et al. 2013    | KF667669        | 5 km N of Poto Walter, Acre, Brazil                            | -8.15 / -72.46      |
| <i>Leptophis ahaetulla</i>         | LSUMZ 12288     | Murphy et al. 2013    | KF667670        | 1 km E of Waimari, Amazonas, Brazil                            |                     |
| <i>Leptophis ahaetulla</i>         | AMNH 140899     | Murphy et al. 2013    | KF667671        | Dubulay Ranch, Guyana                                          | 5.40 / -57.51       |
| <i>Leptophis ahaetulla</i>         | CAS 231717      | Murphy et al. 2013    | KF667673        | Road ER16, Trinidad                                            | 10.04 / -61.37      |
| <i>Leptophis ahaetulla</i>         | UAM H-103       | Murphy et al. 2013    | KF667675        | Lagunita, Mbaracayú Reserve, Canindeyú Department (P)          | -24.1348 / -55.4209 |
| <i>Liolaemus azarai</i>            | GK 3919         | This study            | <b>MN276249</b> | Isla Yacyretá, Misiones Department (P)                         | -27.4306 / -56.7318 |
| <i>Liolaemus azarai</i>            | GK 3927         | This study            | <b>MN276250</b> | Isla Yacyretá, Misiones Department (P)                         | -27.4306 / -56.7318 |
| <i>Lygodactylus wetzeli</i>        | GK 3689         | This study            | <b>MN276251</b> | Estancia Amistad, Boquerón Department (P)                      | -22.4077 / -60.7259 |
| <i>Lygophis dilepis</i>            | GK 3808         | This study            | <b>MN276252</b> | Road Pozo Colorado-Concepcion, Presidente Hayes Department (P) | -23.4709 / -57.6245 |
| <i>Manciola guaporicola</i>        | CZPLT 567       | This study            | <b>MN276253</b> | Laguna Blanca, San Pedro Department (P)                        | -23.8174 / -56.2910 |
| <i>Manciola guaporicola</i>        | PNA 185         | Whiting et al. 2006   | DQ238900        | No data.                                                       |                     |
| <i>Manciola guaporicola</i>        | LG 1574         | Whiting et al. 2006   | DQ238928        | No data.                                                       |                     |
| <i>Manciola guaporicola</i>        | UAM 104         | Karin et al. 2016     | KX364960        | Mbaracayú Reserve, Canindeyú Department (P)                    | -24.1279 / -55.5281 |
| <i>Mastigodryas bifossatus*</i>    | GK 3993         | This study            | <b>MN276254</b> | Granja El Roble, Concepción Department (P)                     | -23.4560 / -57.2803 |
| <i>Mastigodryas bifossatus*</i>    | PCS 325         | This study            | <b>MN276255</b> | Ruta Nueva Colombia–Altos, Cordillera Department (P)           | -25.1453 / -57.2598 |

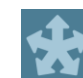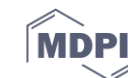

| Species                           | Voucher   | Origin                  | GenBank         | Locality                                                | Lat/Long            |
|-----------------------------------|-----------|-------------------------|-----------------|---------------------------------------------------------|---------------------|
| <i>Mastigodryas bifossatus</i> *  |           | Klaczko et al. 2014     | HM582223        | Sequence not used by the authors in the publication.    |                     |
| <i>Micrablepharus maximiliani</i> | PCS 519   | This study              | <b>MN276256</b> | Laguna Blanca, San Pedro Department (P)                 | -23.8174 / -56.2910 |
| <i>Micrablepharus maximiliani</i> | LG 1017   | Pellegrino et al. 2001  | AF420730        | Barra do Garças, Mato Grosso, Brazil                    | -15.8909 / -52.2506 |
| <i>Micrurus altirostris</i>       | 016       | GenBank only            | JQ627286        | "Brazil". Coordinates provided.                         | -21.98 / -47.87     |
| <i>Micrurus frontalis</i>         | GK 3932   | This study              | <b>MN276257</b> | Isla Yacyretá, Misiones Department (P)                  | -27.4306 / -56.7318 |
| <i>Micrurus pyrrhocryptus</i>     | PCS 310   | This study              | <b>MN276258</b> | 5 km de N of Toro Pampa, Alto Paraguay Department (P)   | -20.9282 / -58.5968 |
| <i>Micrurus</i> sp.               | PCS 334   | This study              | <b>MN276259</b> | Belén, Concepción Department (P)                        | -23.4445 / -57.3544 |
| <i>Micrurus</i> sp.               | PCS 337   | This study              | <b>MN276260</b> | Belén, Concepción Department (P)                        | -23.4445 / -57.3544 |
| <i>Mussurana bicolor</i>          | GK 3621   | This study              | <b>MN276261</b> | Granja El Roble, Concepción Department (P)              | -23.4560 / -57.2803 |
| <i>Mussurana bicolor</i>          | PCS 330   | This study              | <b>MN276262</b> | Granja El Roble, Concepción Department (P)              | -23.4560 / -57.2803 |
| <i>Mussurana bicolor</i>          | FML 15875 | Zaher et al. 2009       | GQ457729        | Argentina                                               |                     |
| <i>Notomabuya frenata</i>         | ALA 3516  | This study              | <b>MN276263</b> | Parque Nacional Cerro Cora, Amambay Department (P)      | -22.6502 / -56.0141 |
| <i>Notomabuya frenata</i>         | GK 3846   | This study              | <b>MN276264</b> | San Bernardino, Cordillera Department (P)               | -25.2944 / -57.3126 |
| <i>Notomabuya frenata</i>         | PCS 313   | This study              | <b>MN276265</b> | Tobich, Alto Paraguay Department (P)                    | -20.2913 / -58.5636 |
| <i>Notomabuya frenata</i>         | PCS 496   | This study              | <b>MN276266</b> | Laguna Blanca, San Pedro Department (P)                 | -23.8174 / -56.2910 |
| <i>Notomabuya frenata</i>         | PCS 538   | This study              | <b>MN276267</b> | Granja SHS, Guairá Department (P)                       | -25.7209 / -56.2512 |
| <i>Notomabuya frenata</i>         |           | Mausfeld & Lötters 2001 | AF202628        | Bolivia                                                 |                     |
| <i>Notomabuya frenata</i>         |           | Mausfeld & Lötters 2001 | AF202629        | Brazil                                                  |                     |
| <i>Notomabuya frenata</i>         | MRT 08714 | Whiting et al. 2006     | DQ238886        | No data.                                                |                     |
| <i>Notomabuya frenata</i>         | PNA 77    | Whiting et al. 2006     | DQ238924        | No data.                                                |                     |
| <i>Notomabuya frenata</i>         | LG 1042   | Whiting et al. 2006     | DQ238925        | No data.                                                |                     |
| <i>Notomabuya frenata</i>         | SC 28     | Whiting et al. 2006     | DQ238932        | No data.                                                |                     |
| <i>Notomabuya frenata</i>         | UAM 60    | Metallinou et al. 2016  | KX231453        | No data.                                                |                     |
| <i>Ophiodes intermedius</i>       | GK 3854   | This study              | <b>MN276268</b> | San Bernardino, Cordillera Department (P)               | -25.3074 / -57.3029 |
| <i>Ophiodes intermedius</i>       | GK 3864   | This study              | <b>MN276269</b> | Areguá, Cordillera Department (P)                       | -25.3145 / -57.3753 |
| <i>Ophiodes intermedius</i>       | PCS 332   | This study              | <b>MN276270</b> | Laguna Blanca, San Pedro Department (P)                 | -23.8174 / -56.2910 |
| <i>Ophiodes intermedius</i>       | PCS 608   | This study              | <b>MN276271</b> | Near Estancia La Rural, Presidente Hayes Department (P) | -24.8168 / -57.7781 |
| <i>Ophiodes intermedius</i>       | PCS 615   | This study              | <b>MN276272</b> | Near Estancia La Rural, Presidente Hayes Department (P) | -24.8168 / -57.7781 |
| <i>Ophiodes</i> sp.               | PCS 374   | This study              | <b>MN276273</b> | Estancia Garay Cué, Concepción Department (P)           | -22.7096 / -57.3778 |
| <i>Ophiodes striatus</i>          |           | Simões et al. 2015      | KR815881        | No data.                                                |                     |
| <i>Oxyrhopus guibei</i>           | ALA 3517  | This study              | <b>MN276274</b> | Parque Nacional Cerro Cora, Amambay Department (P)      | -22.6502 / -56.0141 |
| <i>Oxyrhopus guibei</i>           | PCS 618   | This study              | <b>MN276275</b> | Estancia Achira, Cordillera Department (P)              | -25.1277 / -57.2263 |
| <i>Oxyrhopus guibei</i>           | 004       | GenBank only            | JQ627288        | "Brazil". Coordinates provided.                         | -21.98 / -47.87     |
| <i>Oxyrhopus guibei</i>           | 009       | GenBank only            | JQ627289        | "Brazil". Coordinates provided.                         | -21.98 / -47.87     |
| <i>Oxyrhopus guibei</i>           | 011       | GenBank only            | JQ627290        | "Brazil". Coordinates provided.                         | -21.98 / -47.87     |
| <i>Oxyrhopus guibei</i>           | 013       | GenBank only            | JQ627291        | "Brazil". Coordinates provided.                         | -21.98 / -47.87     |
| <i>Oxyrhopus guibei</i>           | 015       | GenBank only            | JQ627292        | "Brazil". Coordinates provided.                         | -21.98 / -47.87     |
| <i>Oxyrhopus guibei</i>           | 055       | GenBank only            | JQ627294        | "Brazil". Coordinates provided.                         | -21.98 / -47.87     |
| <i>Phalotris matogrossensis</i>   | PCS 329   | This study              | <b>MN276276</b> | Granja El Roble, Concepción Department (P)              | -23.4560 / -57.2803 |
| <i>Phalotris matogrossensis</i>   | PCS 335   | This study              | <b>MN276277</b> | Granja El Roble, Concepción Department (P)              | -23.4560 / -57.2803 |
| <i>Philodryas olfersii</i>        | GK 3937   | This study              | <b>MN276278</b> | Granja El Roble, Concepción Department (P)              | -23.4560 / -57.2803 |
| <i>Philodryas olfersii</i>        |           | Vidal et al. 2000       | AF158484        | São Paulo, Brazil                                       |                     |
| <i>Philodryas patagoniensis</i>   | PCS 311   | This study              | <b>MN276279</b> | Road Loma Plata - Tobich, Alto Paraguay Department (P)  | -21.8695 / -58.6221 |
| <i>Philodryas patagoniensis</i>   | PCS 408   | This study              | <b>MN276280</b> | Estancia Garay Cué, Concepción Department (P)           | -22.7096 / -57.3778 |
| <i>Philodryas patagoniensis</i>   | PCS 605   | This study              | <b>MN276281</b> | Estancia La Rural, Presidente Hayes Department (P)      | -24.8290 / -57.7670 |



| Species                         | Voucher         | Origin                      | GenBank         | Locality                                                | Lat/Long            |
|---------------------------------|-----------------|-----------------------------|-----------------|---------------------------------------------------------|---------------------|
| <i>Philodryas patagoniensis</i> | PCS 622         | This study                  | <b>MN276282</b> | 27 km ESE of 25 de Diciembre, Cordillera Department (P) | -24.9084 / -56.9742 |
| <i>Philodryas patagoniensis</i> | MCP 5753        | Zaher et al. 2009           | GQ457760        | Brazil                                                  |                     |
| <i>Phimophis guerini</i>        | GK 3934         | This study                  | <b>MN276283</b> | Isla Yacyretá, Misiones Department (P)                  | -27.4306 / -56.7318 |
| <i>Phimophis guerini</i>        | ITS 317         | Zaher et al. 2009           | GQ457761        | Brazil                                                  |                     |
| <i>Phimophis vittatus</i>       | GK 3728         | This study                  | <b>MN276284</b> | Filadelfia, Boquerón Department (P)                     | -22.3470 / -60.0489 |
| <i>Phimophis vittatus</i>       | GK 3775         | This study                  | <b>MN276285</b> | 12 km E Filadelfia, Boquerón Department (P)             | -22.3347 / -60.1578 |
| <i>Phyllopezus przewalskii</i>  | MNHNP 11957     | Cacciali et al. 2017b       | <b>MH397465</b> | Parque Nacional Cerro Cora, Amambay Department (P)      | -22.6502 / -56.0141 |
| <i>Phyllopezus przewalskii</i>  | MNHNP 11958     | Cacciali et al. 2017b       | <b>MH397466</b> | Parque Nacional Cerro Cora, Amambay Department (P)      | -22.6502 / -56.0141 |
| <i>Phyllopezus przewalskii</i>  | SMF 100495      | Cacciali et al. 2017b       | <b>MF278834</b> | Estancia Amistad, Boquerón Department (P)               | -22.4077 / -60.7259 |
| <i>Phyllopezus przewalskii</i>  | MNCN 5903       | Gamble et al. 2012          | JN935577        | Serranía Aguarague, Tarija, Bolivia                     | -21.27 / -64.85     |
| <i>Phyllopezus przewalskii</i>  | MTD 43490       | Gamble et al. 2012          | JN935578        | Fortín Toledo, Boquerón Department (P)                  | -22.3577 / -60.3384 |
| <i>Phyllopezus przewalskii</i>  | MTD 43492       | Gamble et al. 2012          | JN935579        | Fortín Toledo, Boquerón Department (P)                  | -22.3577 / -60.3384 |
| <i>Phyllopezus przewalskii</i>  | TG 00105        | Gamble et al. 2012          | JN935565        | Paraguay                                                |                     |
| <i>Phyllopezus heuteri</i>      | MHNHNP 2 39     | Cacciali et al. 2017b       | <b>MH397468</b> | Cerro de Tobatí, Cordillera Department (P)              | -25.2797 / -57.0925 |
| <i>Phyllopezus heuteri</i>      | MHNHNP 2 40     | Cacciali et al. 2017b       | <b>MH397467</b> | Cerro de Tobatí, Cordillera Department (P)              | -25.2797 / -57.0925 |
| <i>Polychrus acutirostris</i>   | GK 3802         | This study                  | <b>MN276286</b> | Near Granja El Roble, Concepción Department (P)         | -23.4551 / -57.2858 |
| <i>Polychrus acutirostris</i>   | GK 3807         | This study                  | <b>MN276287</b> | 1 km E Concepción, Presidente Hayes Department (P)      | -23.4541 / -57.4676 |
| <i>Polychrus acutirostris</i>   | PCS 612         | This study                  | <b>MN276288</b> | Estancia La Rural, Presidente Hayes Department (P)      | -24.8290 / -57.7670 |
| <i>Polychrus acutirostris</i>   | POE 2767        | Torres-Carvajal et al. 2017 | KY982367        | Rio Sehra Resort, Warnes, Bolivia                       | -17.56 / -63.19     |
| <i>Polychrus acutirostris</i>   | POE 2783        | Torres-Carvajal et al. 2017 | KY982369        | Ambero EcoResort, Ichilo, Bolivia                       | -17.45 / -63.67     |
| <i>Polychrus acutirostris</i>   | ZFMK 59756      | Torres-Carvajal et al. 2017 | KY982371        | Caruaru, Pernambuco, Brazil                             | -8.28 / -35.97      |
| <i>Psomophis genimaculatus</i>  | GK 3791         | This study                  | <b>MN276289</b> | E of Filadelfia, Boquerón Department (P)                | -22.5585 / -59.4885 |
| <i>Psomophis genimaculatus</i>  | PGE001          | Zaher et al. 2009           | GQ457767        | Brazil                                                  |                     |
| <i>Salvator merianae</i>        | PCS 437         | This study                  | <b>MN276290</b> | Estancia Ka'i Ragüe, Amambay Department (P)             | -23.2469 / -56.2099 |
| <i>Salvator merianae</i>        | 060             | GenBank only                | JQ627299        | "Brazil". Coordinates provided.                         | -21.98 / -47.87     |
| <i>Salvator merianae</i>        | 065             | GenBank only                | JQ627300        | "Brazil". Coordinates provided.                         | -21.98 / -47.87     |
| <i>Salvator merianae</i>        | CHUNB 00486     | Murphy et al. 2016          | KU894535        | No data.                                                |                     |
| <i>Salvator merianae</i>        | CHUNB 00503     | Murphy et al. 2016          | KU894536        | No data.                                                |                     |
| <i>Salvator merianae</i>        | LH 607          | Murphy et al. 2016          | KU894537        | No data.                                                |                     |
| <i>Sibynomorphus turgidus**</i> | PCS 528         | This study                  | <b>MN276291</b> | Melgarejo, Guairá Department (P)                        | -25.7193 / -56.2346 |
| <i>Sibynomorphus turgidus**</i> | LSUMNS 6459     | Figueroa et al. 2016        | KX660279        | No data.                                                |                     |
| <i>Stenocercus caducus</i>      | PC 43           | This study                  | <b>MN276292</b> | Dr. Juan E. Estigarribia, Caaguazú Department (P)       | -25.3672 / -55.7127 |
| <i>Stenocercus caducus</i>      | PCS 498         | This study                  | <b>MN276293</b> | Laguna Blanca, San Pedro Department (P)                 | -23.8103 / -56.2954 |
| <i>Teius oculatus</i>           | MNHNP 11802     | This study                  | <b>MN276297</b> | Distrito Itakyry, Alto Paraná Department (P)            | -24.9830 / -55.0827 |
| <i>Teius oculatus</i>           | MNHNP 11803     | This study                  | <b>MN276298</b> | Distrito Itakyry, Alto Paraná Department (P)            | -24.9830 / -55.0827 |
| <i>Teius oculatus</i>           | MNHNP 11836     | This study                  | <b>MN276299</b> | Parque Nacional San Rafael, Itapúa Department (P)       | -26.5115 / -55.7924 |
| <i>Teius oculatus</i>           | SC 407          | This study                  | <b>MN276300</b> | 20 km E de Melo, Cerro Largo, Uruguay                   | -32.21 / -53.59     |
| <i>Teius oculatus</i>           | SC 408          | This study                  | <b>MN276301</b> | 20 km E de Melo, Cerro Largo, Uruguay                   | -32.21 / -53.59     |
| <i>Teius oculatus</i>           | LJAMM-CNP 5730  | This study                  | <b>MN276294</b> | La Paz, Mendoza, Argentina                              | -34.07 / -66.49     |
| <i>Teius oculatus</i>           | LJAMM-CNP 5772  | This study                  | <b>MN276295</b> | San Luis capital, Argentina                             | -33.46 / -66.38     |
| <i>Teius oculatus</i>           | LJAMM-CNP 6915  | This study                  | <b>MN276296</b> | Villarino, Buenos Aires, Argentina                      | -38.38 / -63.05     |
| <i>Teius teyou</i>              | MNHNP 11813     | This study                  | <b>MN276306</b> | Agrogranadada Solito, Presidente Hayes Department (P)   | -24.2908 / -58.8372 |
| <i>Teius teyou</i>              | PCS 215         | This study                  | <b>MN276307</b> | Quinta Las Andreas, Cordillera Department (P)           | -25.2250 / -57.2410 |
| <i>Teius teyou</i>              | PCS 563         | This study                  | <b>MN276308</b> | Rancho 068, San Pedro Department (P)                    | -23.7089 / -56.3596 |
| <i>Teius teyou</i>              | LJAMM-CNP 12043 | This study                  | <b>MN276302</b> | Anta, Salta, Argentina                                  | -24.32 / -63.23     |

| Species                          | Voucher         | Origin                 | GenBank         | Locality                                                         | Lat/Long            |
|----------------------------------|-----------------|------------------------|-----------------|------------------------------------------------------------------|---------------------|
| <i>Teius teyou</i>               | LJAMM-CNP 12128 | This study             | <b>MN276303</b> | Ojo de Agua, Santiago del Estero, Argentina                      | -29.19 / -63.53     |
| <i>Teius teyou</i>               | LJAMM-CNP 12488 | This study             | <b>MN276304</b> | Valle Fértil, San Juan, Argentina                                | -30.12 / -67.40     |
| <i>Teius teyou</i>               | LJAMM-CNP 8578  | This study             | <b>MN276305</b> | Castro Barros, La Rioja, Argentina                               | -28.44 / -66.56     |
| <i>Thamnodynastes chaquensis</i> | GK 3638         | This study             | <b>MN276309</b> | Road Concepción/Pozo Colorado, Presidente Hayes Department (P)   | -23.4664 / -57.6071 |
| <i>Thamnodynastes hypoconia</i>  | PCS 610         | This study             | <b>MN276310</b> | Near Estancia La Rural, Presidente Hayes Department (P)          | -24.8023 / -57.7882 |
| <i>Thamnodynastes hypoconia</i>  | PCS 611         | This study             | <b>MN276311</b> | Estancia La Rural, Presidente Hayes Department (P)               | -24.8290 / -57.7670 |
| <i>Thamnodynastes hypoconia</i>  | KU 290727       | Figueroa et al. 2016   | KX660253        | No data.                                                         |                     |
| <i>Tropidurus catalanensis</i>   | SMF 100093      | Cacciali & Köhler 2018 | <b>MG438491</b> | Isla Yacyretá, Misiones Department (P)                           | -27.4306 / -56.7318 |
| <i>Tropidurus catalanensis</i>   | SMF 100090      | Cacciali & Köhler 2018 | <b>MG438492</b> | Isla Yacyretá, Misiones Department (P)                           | -27.4306 / -56.7318 |
| <i>Tropidurus catalanensis</i>   | UFRGST 2890     | Carvalho et al. 2016   | KU245311        | Manoel Viana, Rio Grande do Sul, Brazil                          | -29.59 / -55.49     |
| <i>Tropidurus etheridgei</i>     | SMF 101595      | Cacciali & Köhler 2018 | <b>MG438493</b> | Filadelfia, Boquerón Department (P)                              | -22.3470 / -60.0489 |
| <i>Tropidurus etheridgei</i>     | SMF 101596      | Cacciali & Köhler 2018 | <b>MG438949</b> | Filadelfia, Boquerón Department (P)                              | -22.3470 / -60.0489 |
| <i>Tropidurus etheridgei</i>     | LG 1096         | Carvalho et al. 2016   | KU245298        | Fuerte Esperanza, Chaco, Argentina                               | -25.1602 / -61.8442 |
| <i>Tropidurus lagunablanca</i>   | SMF 103320      | Cacciali & Köhler 2018 | <b>MG438497</b> | Laguna Blanca, San Pedro Department (P)                          | -23.8174 / -56.2910 |
| <i>Tropidurus spinulosus</i>     | SMF 100095      | Cacciali & Köhler 2018 | <b>MG438495</b> | San Bernardino, Cordillera Department (P)                        | -25.3074 / -57.3029 |
| <i>Tropidurus spinulosus</i>     | SMF 100096      | Cacciali & Köhler 2018 | <b>MG438496</b> | San Bernardino, Cordillera Department (P)                        | -25.3074 / -57.3029 |
| <i>Tropidurus spinulosus</i>     | SMF 100094      | Cacciali & Köhler 2018 | <b>MG438498</b> | Estancia Amistad, Boquerón Department (P)                        | -22.4069 / -60.7285 |
| <i>Tropidurus spinulosus</i>     | AMNH 176295     | Carvalho et al. 2016   | KU245314        | Loma Plata, Boquerón Department (P)                              | -22.374 / -59.829   |
| <i>Tropidurus spinulosus</i>     | IIBP-H 3463     | Cacciali & Köhler 2018 | <b>MG438500</b> | Estación Biológica Tres Gigantes, Alto Paraguay Department (P)   | -20.0810 / -58.1651 |
| <i>Tropidurus spinulosus</i>     | PCS 312         | Cacciali & Köhler 2018 | <b>MG438499</b> | Tobich, Alto Paraguay Department (P)                             | -20.2913 / -58.5636 |
| <i>Tropidurus tarara</i> ***     | SMF 103314      | Cacciali & Köhler 2018 | <b>MG438501</b> | Retiro 7 de Junio, Estancia Garay Cue, Concepción Department (P) | -22.5830 / -57.3278 |
| <i>Tropidurus tarara</i> ***     | SMF 103315      | Cacciali & Köhler 2018 | <b>MG438502</b> | Retiro 7 de Junio, Estancia Garay Cue, Concepción Department (P) | -22.5830 / -57.3278 |
| <i>Tropidurus tarara</i> ***     | SMF 103316      | Cacciali & Köhler 2018 | <b>MG438503</b> | Estancia Garay Cué, Concepción Department (P)                    | -22.7096 / -57.3778 |
| <i>Tropidurus teyumirim</i> ***  | AMNHFS 20281    | Cacciali & Köhler 2018 | <b>MG438504</b> | Parque Nacional Ybycuí, Paraguari Department (P)                 | -26.0954 / -56.8387 |
| <i>Vanzosaura multiscutata</i>   | MRT 5059        | Pellegrino et al. 2001 | AF420716        | Vacaria, Bahía, Brazil                                           | -10.659 / -42.604   |
| <i>Vanzosaura rubricauda</i>     | ALA 3513        | This study             | <b>MN276312</b> | Parque Nacional Cerro Cora, Amambay Department (P)               | -22.6502 / -56.0141 |
| <i>Vanzosaura rubricauda</i>     | ALA 3514        | This study             | <b>MN276313</b> | Parque Nacional Cerro Cora, Amambay Department (P)               | -22.6502 / -56.0141 |
| <i>Vanzosaura rubricauda</i>     | ALA 3528        | This study             | <b>MN276314</b> | Parque Nacional Cerro Cora, Amambay Department (P)               | -22.6502 / -56.0141 |
| <i>Vanzosaura rubricauda</i>     | GK 3801         | This study             | <b>MN276315</b> | Estancia Amistad, Boquerón Department (P)                        | -22.4069 / -60.7285 |
| <i>Xenodon merremi</i>           | GK 3821         | This study             | <b>MN276316</b> | San Bernardino, Cordillera Department (P)                        | -25.3074 / -57.3029 |
| <i>Xenodon merremi</i>           | PCS 531         | This study             | <b>MN276317</b> | Guairá Department Filadelfia, Boquerón Department (P)            |                     |
| <i>Xenodon pulcher</i>           | GK 3773         | This study             | <b>MN276319</b> | Kleefeld, Boquerón Department (P)                                | -22.3470 / -60.0489 |
| <i>Xenodon pulcher</i>           | GK 3778         | This study             | <b>MN276318</b> | Estación Biológica Tres Gigantes, Alto Paraguay Department (P)   | -22.3406 / -60.0088 |
| <i>Sphenodon punctatus</i>       |                 | Miller 2006            | DQ267621        | New Zeland                                                       |                     |

**Observations:** Specimens marked with “(P)” proceed from Paraguay. \**Mastigodryas bifossatus* is currently *Palusophis bifossatus* according to Montingelli et al. (2019).

\*\**Sibynomorphus turgidus* is currently *Dipsas turgidus* according to Arteaga et al. (2018). \*\*\*These species are currently recognized as *T. lagunablanca* according to Cacciali & Köhler (2018).

## References

- Alencar, L.R.; Quental, T.B.; Grazziotin, F.G.; Alfaro, M.L.; Martins, M.; Venzon, M.; Zaher, H. 2016. Diversification in vipers: Phylogenetic relationships, time of divergence and shifts in speciation rates. *Molecular Phylogenetics and Evolution* **2016**, *105*, 50–62. DOI: 10.1016/j.ympev.2016.07.029
- Arteaga, A.; Salazar-Valenzuela, D.; Mebert, K.; Peñafiel, N.; Aguiar, G.; Sánchez-Nivicela, J.C.; Pyron, R.A.; Colston, T.J.; Cisneros-Heredia, D.F.; Yáñez-Muñoz, M.H.; Venegas, P.J.; Guayasamin, J.M.; Torres-Carvajal, O. Systematics of South American snail-eating snakes (Serpentes, Dipsadini), with the description of five new species from Ecuador and Peru. *ZooKeys* **2018**, *766*, 79–147. DOI: 10.3897/zookeys.766.24523

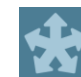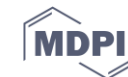

- Cacciali, P.; Köhler, G. Diversity of *Tropidurus* (Squamata: Tropiduridae) in Paraguay—an integrative taxonomic approach based on morphological and molecular genetic evidence. *Zootaxa* **2018**, *4375*, 511–536. DOI: 10.11646/zootaxa.4375.4.3
- Cacciali, P.; Morando, M.; Medina, C.D.; Köhler, G.; Motte, M.; Avila, L.J. Taxonomic analysis of Paraguayan samples of *Homonota fasciata* Duméril & Bibron (1836) with the revalidation of *Homonota horrida* Burmeister (1861) (Reptilia: Squamata: Phyllodactylidae) and the description of a new species. *PeerJ* **2017**, *5*, e3523. DOI: 10.7717/peerj.3523
- Cacciali, P.; Morando, M.; Avila, L.J.; Köhler, G. Description of a new species of *Homonota* (Reptilia, Squamata, Phyllodactylidae) from the central region of northern Paraguay. *Zoosystematics and Evolution* **2018a**, *94*, 147–161. DOI: 10.3897/zse.94.21754
- Carvalho, A.L.G.; Sena, M.A.; Peloso, P.L.V.; Machado, F.A.; Montesinos, R.; Silva, H.R.; Campbell, G.; Rodrigues, M.T. A new *Tropidurus* (Tropiduridae) from the semiarid Brazilian Caatinga: evidence for conflicting signal between mitochondrial and nuclear loci affecting the phylogenetic reconstruction of South American collared lizards. *American Museum Novitates* **2016**, *3852*, 1–66.
- Castoe, T.A.; Parkinson, C.L. Bayesian mixed models and the phylogeny of pitvipers (Viperidae: Serpentes). *Molecular Phylogenetics and Evolution* **2006**, *39*, 91–110. DOI: 10.1016/j.ympev.2005.12.014
- Fenwick, A.M.; Guberlet, R.L.; Evans, J.A.; Parkinson, C.L. Morphological and molecular evidence for phylogeny and classification of South American pitvipers, genera *Bothrops*, *Bothriopsis*, and *Bothrocophias* (Serpentes: Viperidae). *Zoological Journal of the Linnean Society* **2009**, *156*, 617–640. DOI: 10.1111/j.1096-3642.2008.00495.x
- Figueroa, A.; McKelvy, A.D.; Grismer, L.L.; Bell, C.D.; Lailvaux, S.P. A species-level phylogeny of extant snakes with description of a new Colubrid subfamily and genus. *PLoS ONE* **2016**, *11*, e0161070. DOI: 10.1371/journal.pone.0161070
- Gamble, T.; Colli, G.R.; Rodrigues, M.T.; Werneck, F.P.; Simons, A.M. Phylogeny and cryptic diversity in geckos (*Phyllopezus*; Phyllodactylidae; Gekkota) from South America’s open biomes. *Molecular Phylogenetics and Evolution* **2012**, *62*, 943–953. DOI: 10.1016/j.ympev.2011.11.033
- Hamdan, B.; Pereira, A.G.; Loss-Oliveira, L.; Rödder, D.; Schargo, C.G. Evolutionary analysis of *Chironius* snakes unveils cryptic diversity and provides clues to diversification in the Neotropics. *Molecular Phylogenetics and Evolution* **2017**, *116*, 108–119. DOI: 10.1016/j.ympev.2017.08.004
- Hodson, E.E.; Lehtinen, R.M. Diverse evidence for the decline of an adaptation in a coral snake mimic. *Evolutionary Biology* **2017**, *44*, 401–410. DOI: 10.1007/s11692-017-9418-7
- Karin, B.R.; Metallinou M.; Weinell J.L.; Jackman T.R.; Bauer A.M. Resolving the higher-order phylogenetic relationships of the circumtropical *Mabuya* group (Squamata: Scincidae): An out-of-Asia diversification. *Molecular Phylogenetics and Evolution* **2016**, *106*, 220–232. DOI: 10.1016/j.ympev.2016.05.033
- Klacko, J.; Montingelli, G.G.; Zaher, H. A combined morphological and molecular phylogeny of the genus *Chironius* Fitzinger, 1826 (Serpentes: Colubridae). *Zoological Journal of the Linnean Society* **2014**, *171*, 656–667. DOI: 10.1111/zoj.12147
- Koch, C.; Venegas, P.J.; Rödder, D.; Flecks, M.; Böhme, W. Two new endemic species of *Ameiva* (Squamata: Teiidae) from the dry forest of northwestern Peru and additional information on *Ameiva concolor* Ruthven, 1924. *Zootaxa* **2013**, *3745*, 263–295. DOI: 10.11646/zootaxa.3745.2.6
- Mausfeld, P.; Lötters, S. Systematics of *Mabuya frenata cochabambae* Dunn, 1935 (Reptilia, Sauria, Scincidae) from Inner-Andean Dry Valleys of Bolivia. *Studies on Neotropical Fauna and Environment* **2001**, *36*, 49–55.
- Metallinou, M.; Weinell, J.L.; Karin, B.R.; Conradie, W.; Wagner, P.; Schmitz, A.; Jackman, T.R.; Bauer, A.M. A single origin of extreme matrotrophy in African mabuyine skinks. *Proceedings of the Royal Society* **2016**, *12*, 20160430. DOI: 10.1098/rsbl.2016.0430
- Miller, H.C. Cloacal and buccal swabs are a reliable source of DNA for microsatellite genotyping of reptiles. *Conservation Genetics* **2006**, *7*, 1001–1003. DOI: 10.1007/s10592-006-9120-2
- Montignelli, G.G.; Grazziotin, F.G.; Battilana, J.; Murphy, R.W.; Zhang, Y.-P.; Zaher, H. Higher-level phylogenetic affinities of the Neotropical genus *Mastigodryas* Amaral, 1934 (Serpentes: Colubridae), species-group definition and description of a new genus for *Mastigodryas bifossatus*. *Journal of Zoological Systematics and Evolutionary Research* **2019**, *57*, 205–239. DOI: 10.1111/jzs.12262
- Mott, T.; Vieites, D.R. Molecular phylogenetics reveals extreme morphological homoplasy in Brazilian worm lizards challenging current taxonomy. *Molecular Phylogenetics and Evolution* **2009**, *51*, 190–200. DOI: 10.1016/j.ympev.2009.01.014
- Cacciali, P.; Buonghermini, E.; Köhler, G.

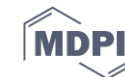

- Murphy, J.C.; Charles, S.P.; Lehtinen, R.M.; Koeller, K.L. A molecular and morphological characterization of Oliver's parrot snake, *Leptophis coeruleodorsus* (Squamata: Serpentes: Colubridae) with the description of a new species from Tobago. *Zootaxa* **2013**, *3718*, 561–574. DOI: 10.11646/zootaxa.3718.6.4
- Murphy, J.C.; Jowers, M.J.; Lehtinen, R.M.; Charles, S.P.; Colli, G.R.; Peres Jr, A.K.; Hendry, C.R.; Pyron, R.A. Cryptic, sympatric diversity in Tegu lizards of the *Tupinambis teguixin* Group (Squamata, Sauria, Teiidae) and the description of three new species. *PLoS ONE* **2016**, *11*, e0158542. DOI: 10.1371/journal.pone.0158542
- Pellegrino, K.; Rodrigues, M.T.; Yonenaga-Yassuda, Y.; Sites, J.W. A molecular perspective on the evolution of microteiid lizards (Squamata, Gymnophthalmidae), and a new classification for the family. *Biological Journal of the Linnean Society* **2001**, *74*, 315–338. DOI: 10.1006/bijl.2001.0580
- Rocha, S.; Carretero, M.A.; Harris, D.J. On the diversity, colonization patterns and status of *Hemidactylus* spp. (Reptilia: Gekkonidae) from the Western Indian Ocean islands. *Herpetological Journal* **2010**, *20*, 83–89.
- Rodrigues, K.G. 2016. Genética aplicada à ecologia das estratas: um estudo na Estrada municipal Guilherme Scatena (São Carlos, SP) e potencial impacto na biodiversidade local. M.Sc. Thesis, Centro de Ciências Biológicas e da Saúde, Universidade Federal de São Carlos, Brazil. 55 pp.
- Simões, B.F.; Sampaio, F.L.; Douglas, R.H.; Kodandaramaiah, U.; Casewell, N.R.; Harrison, R.A.; Hart, N.S.; Partridge, J.C.; Hunt, D.M.; Gower, D.J. Visual pigments, ocular filters and the evolution of snake vision. *Molecular Biology and Evolution* **2016**, *33*, 2483–2495. DOI: 10.1093/molbev/msw148
- Simões, B.F.; Sampaio, F.L.; Jared, C.; Antoniazzi, M.M.; Loew, E.R.; Bowmaker, J.K.; Rodriguez, A.; Hart, N.S.; Hunt, D.M.; Partridge, J.C.; Gower, D.J. Visual system evolution and the nature of the ancestral snake. *Journal of Evolutionary Biology* **2015**, *28*, 1309–1320. DOI: 10.1111/jeb.12663
- Torres-Carvajal, O.; Koch, C.; Venegas, P.J.; Poe, S. Phylogeny and diversity of neotropical monkey lizards (Iguanidae: *Polychrus* Cuvier, 1817). *PLoS ONE* **2017**, *12*, e0178139. DOI: 10.1371/journal.pone.0178139
- Vences, M.; Glaw, F.; Kosuch, J.; Böhme, W.; Veith, M. Phylogeny of South American and Malagasy Boine snakes: molecular evidence for the validity of *Sanzinia* and *Acrantophis* and biogeographic implications. *Copeia* **2001**, *2001*, 1151–1154. DOI: 10.1643/0045-8511(2001)001[1151:POSAAM]2.0.CO;2
- Vidal, N.; Kindl, S.G.; Wong, A.; Hedges, S.B. Phylogenetic relationships of Xenodontine snakes inferred from 12S and 16S ribosomal RNA sequences. *Molecular Phylogenetics and Evolution* **2000**, *14*, 389–402. DOI: 10.1006/mpev.1999.0717
- Werneck, F.; Giugliano, L.G.; Collevatti, R.G.; Colli, G.R. Phylogeny, biogeography and evolution of clutch size in South American lizards of the genus *Kentropyx* (Squamata: Teiidae). *Molecular Ecology* **2009**, *18*, 262–278. DOI: 10.1111/j.1365-294X.2008.03999.x
- Whiting, A.S.; Bauer, A.M.; Sites, J. Phylogenetic relationships and limb loss in sub-Saharan African scincine lizards (Squamata: Scincidae). *Molecular Phylogenetics and Evolution* **2003**, *29*, 582–598. DOI: 10.1016/S1055-7903(03)00142-8
- Whiting, A.S.; Sites, J.W.; Pellegrino, K.C.M.; Rodrigues, M.T. Comparing alignment methods for inferring the history of the new world lizard genus *Mabuya* (Squamata: Scincidae). *Molecular Phylogenetics and Evolution* **2006**, *38*, 719–730. DOI: 10.1016/j.ympev.2005.11.011
- Zaher, H.; Grazziotin, F.G.; Cadle, J.E.; Murphy, R.W.; de Moura-Leite, J.C.; Bonatto, S.L. Molecular phylogeny of advanced snakes (Serpientes, Caenophidia) with an emphasis on South American Xenodontines: a revised classification and descriptions of new taxa. *Papeis Avulsos de Zoologia* **2009**, *49*, 115–153. DOI: 10.1590/S0031-10492009001100001
